# Supplementary material
Source: MDPI journal article supplement (https://www.mdpi.com/2073-445X/9/6/202)
Supplement: s1 [file s1]

# Electronic Supplementary Material

## Semi structured interview questions for livestock farmers

Indicate type of farm (Tick ✓)

Beef ☐ Dairy ☐ Sheep ☐ Pig ☐ Mixed ☐ Other .....

1. Indicate either positive or negative on how the 2018 dry spell impacted your farm.

Tick ✓ either **positive column** or **negative column**

| Kind of impact                                       | Positive                 | Negative                 |
|------------------------------------------------------|--------------------------|--------------------------|
| Grass/Pasture growth conditions                      | <input type="checkbox"/> | <input type="checkbox"/> |
| Grass/Pasture yield at harvest or grazing time yield | <input type="checkbox"/> | <input type="checkbox"/> |
| Feed availability (Forage and fodder availability)   | <input type="checkbox"/> | <input type="checkbox"/> |
| Bedding (i.e. Straw)                                 | <input type="checkbox"/> | <input type="checkbox"/> |
| Animal growth                                        | <input type="checkbox"/> | <input type="checkbox"/> |
| Milk production                                      | <input type="checkbox"/> | <input type="checkbox"/> |
| Animal welfare (eg. Diseases and parasites)          | <input type="checkbox"/> | <input type="checkbox"/> |
| Income                                               | <input type="checkbox"/> | <input type="checkbox"/> |
| Costs of purchasing items / Expenses                 | <input type="checkbox"/> | <input type="checkbox"/> |
| Price of farm produce                                | <input type="checkbox"/> | <input type="checkbox"/> |
| Farmer wellbeing (eg. Stress, illness, etc)          | <input type="checkbox"/> | <input type="checkbox"/> |
| Other                                                | <input type="checkbox"/> | <input type="checkbox"/> |

2. Could you mention the main strategies you used in coping with the drought impact?

| Kind of response                                           | Tick                     |  |
|------------------------------------------------------------|--------------------------|--|
| Drug administration (Vaccination)                          | <input type="checkbox"/> |  |
| Construction of wallows                                    | <input type="checkbox"/> |  |
| Planting Catch crop / Cover crop as feed<br>(eg. Brassica) | <input type="checkbox"/> |  |
| Investment in water supply and infrastructure              | <input type="checkbox"/> |  |
| Feed and bedding management                                | <input type="checkbox"/> |  |
| Feed purchases                                             | <input type="checkbox"/> |  |
| Feed sales                                                 | <input type="checkbox"/> |  |
| Selling animals                                            | <input type="checkbox"/> |  |
| Culling animals                                            | <input type="checkbox"/> |  |
| <b>Stock Management</b>                                    |                          |  |
| 1. Drying Cows                                             | <input type="checkbox"/> |  |
| 2. Grazing at night                                        | <input type="checkbox"/> |  |
| 3. Outdoor housing                                         | <input type="checkbox"/> |  |
| 4. Weight control                                          | <input type="checkbox"/> |  |
| 5. Maintaining breeding herd                               | <input type="checkbox"/> |  |
|                                                            |                          |  |
| Fire management                                            | <input type="checkbox"/> |  |

|                               |                          |                         |
|-------------------------------|--------------------------|-------------------------|
| Water abstractions management | <input type="checkbox"/> |                         |
| Other                         | <input type="checkbox"/> | Specify: .....<br>..... |

3. Why did you choose to use different strategies in mitigating the drought impact?

.....  
.....

4. Did you receive any form of assistance that helped you during the drought?

If yes, who are they and what kind of assistance did they provide?

| S/N | Actors                                                  | Tick                     | Nature of Support                                                          | S/N |
|-----|---------------------------------------------------------|--------------------------|----------------------------------------------------------------------------|-----|
| 1   | Natural England, NE                                     | <input type="checkbox"/> | Derogation                                                                 |     |
| 2   | Environmental Agencies, EA                              | <input type="checkbox"/> | Financial support<br>(eg. extra funds,<br>waivers, early<br>payments, etc) |     |
| 3   | Rural Payment Agency, RPA                               | <input type="checkbox"/> | Collective<br>support/Farmers'<br>groups                                   |     |
| 4   | Agriculture and Horticulture<br>Development Board, AHDB | <input type="checkbox"/> | Farming advice                                                             |     |
| 5   | Department for Environment, Food<br>and Rural Affairs   | <input type="checkbox"/> | Flexible<br>specification or                                               |     |

|    |                                                                                             |                          |                            |  |
|----|---------------------------------------------------------------------------------------------|--------------------------|----------------------------|--|
|    |                                                                                             |                          | preference by<br>retailers |  |
| 6  | Retailers and or Food processing companies                                                  | <input type="checkbox"/> | Others (Specify)           |  |
| 7  | Farm inputs manufacturers                                                                   | <input type="checkbox"/> |                            |  |
| 8  | National Farmers Union (NFU)                                                                | <input type="checkbox"/> |                            |  |
| 9  | Farming charity organisation<br>(eg. Forage aid, Royal Agricultural Benevolent Institution) | <input type="checkbox"/> |                            |  |
| 10 | Research scientist                                                                          | <input type="checkbox"/> |                            |  |
| 11 | National press journalists                                                                  | <input type="checkbox"/> |                            |  |
| 12 | Neighbouring farmers                                                                        | <input type="checkbox"/> |                            |  |
| 13 | Other                                                                                       | <input type="checkbox"/> |                            |  |

5. What have you done to prepare your farm for future drought?
